# Supplementary material for: Transcriptomic Analysis for the Identification of Metabolic Pathway Genes Related to Toluene Response in Ardisia pusilla
Source: MDPI journal article supplement (doi:10.3390/plants10051011), 2021-05-19
Supplement: s1 [file s1]

**Table S1.** Primer sequences for metabolic pathways and reference genes used in this study.

| Gene name | GenBank ID     | Primer Sequence(5' to 3') |                          |
|-----------|----------------|---------------------------|--------------------------|
| OMT1      | NM_124796.4    | Forward                   | CCCTCTTCGCCATGCAACTA     |
|           |                | Reverse                   | AGCGATCTCGGTAGGAGACA     |
| APG1      | NM_116206.3    | Forward                   | ATGCAAGATCGTCGAGGGAG     |
|           |                | Reverse                   | AGAAGGGGTTGTTGACAGGC     |
| HAI       | NM_127453.4    | Forward                   | GGTCTTAGGTCGTTGGCAGT     |
|           |                | Reverse                   | CTGTCGTGTCTTGGAGGGTC     |
| GAPCP1    | NM_106601.4    | Forward                   | ACGGCTACAGAAGTGCCATC     |
|           |                | Reverse                   | ACCAACCTTCCAATCCGACC     |
| YUC4      | NM_180477.2    | Forward                   | GCGAGCTTCCTCTTATGCCT     |
|           |                | Reverse                   | ACCGTCTTGCGTCTTCACAT     |
| MDH       | NM_114620.3    | Forward                   | GTGCTGCTGGTGGTATAGGT     |
|           |                | Reverse                   | GTTAGCCCTCACAACATCCA     |
| EFE       | NM_100380.4    | Forward                   | GCATCATCCTCCTCTTCCA      |
|           |                | Reverse                   | GGAGGAACATCGACCCACTC     |
| TIM       | NM_127687.4    | Forward                   | ACCGCGTCAATTCTCTACC      |
|           |                | Reverse                   | GCATCAGCAAACGCCTTCAG     |
| NIR       | NM_127123.3    | Forward                   | ATTGGCAGATCCGTGGTGTT     |
|           |                | Reverse                   | CCCAAGCATCAAGAGGAATCG    |
| At4G17260 | NM_117832.4    | Forward                   | AACTCTCTGGCTTTCCGGTG     |
|           |                | Reverse                   | AATGCCACTGAGCTGTCTCC     |
| Actin     | XM_009601581.3 | Forward                   | TGCTGATCGTATGAGCAAGGAA   |
|           |                | Reverse                   | GGTGGAGCAACAACCTTAATCTTC |

*OMT1: O-methyltransferase 1; APG1: S-adenosyl-L-methylionine-dependent methyltransferases superfamily protein; HAI: H [ + ] - ATPase 1; GAPCP1: glyceraldehyde-3-phosphate dehydrogenation of plastid 1; YUC4: flavin binding monooxygenase family protein; MDH: malate dehydrogenase; EFE: ethylene forming enzyme; TIM: triosephosphate isomerase; NIR: nitrite reductase 1; AT4G17260: lactate/malate dehydrogenase family protein.*

**Table S2.** Assembly statistics and statistics of clustered contigs (unigene) in *A. pusilla* leaf transcriptome.

| Assembly                   | Merge                  |                                 |                            |
|----------------------------|------------------------|---------------------------------|----------------------------|
|                            | All transcript contigs | Only longest isoform per 'gene' | Clustered Contig 'Unigene' |
| Total trinity 'genes'      | 99,322                 | 99,322                          | 88,444                     |
| Total trinity transcripts  | 135,095                | 99,322                          | 88,444                     |
| Percent GC (%)             | 42.85                  | 42.92                           | 42.71                      |
| N50                        | 1,137                  | 955                             | 1,049                      |
| Maximum contig length (bp) | 17,716                 | 17,716                          | 17,716                     |
| Minimum contig length (bp) | 201                    | 201                             | 201                        |
| Median contig length (bp)  | 397                    | 340                             | 350                        |
| Average contig length (bp) | 694.06                 | 609.44                          | 637                        |
| Total assembled bases(bp)  | 93,764,604             | 60,531,284                      | 56,354,554                 |

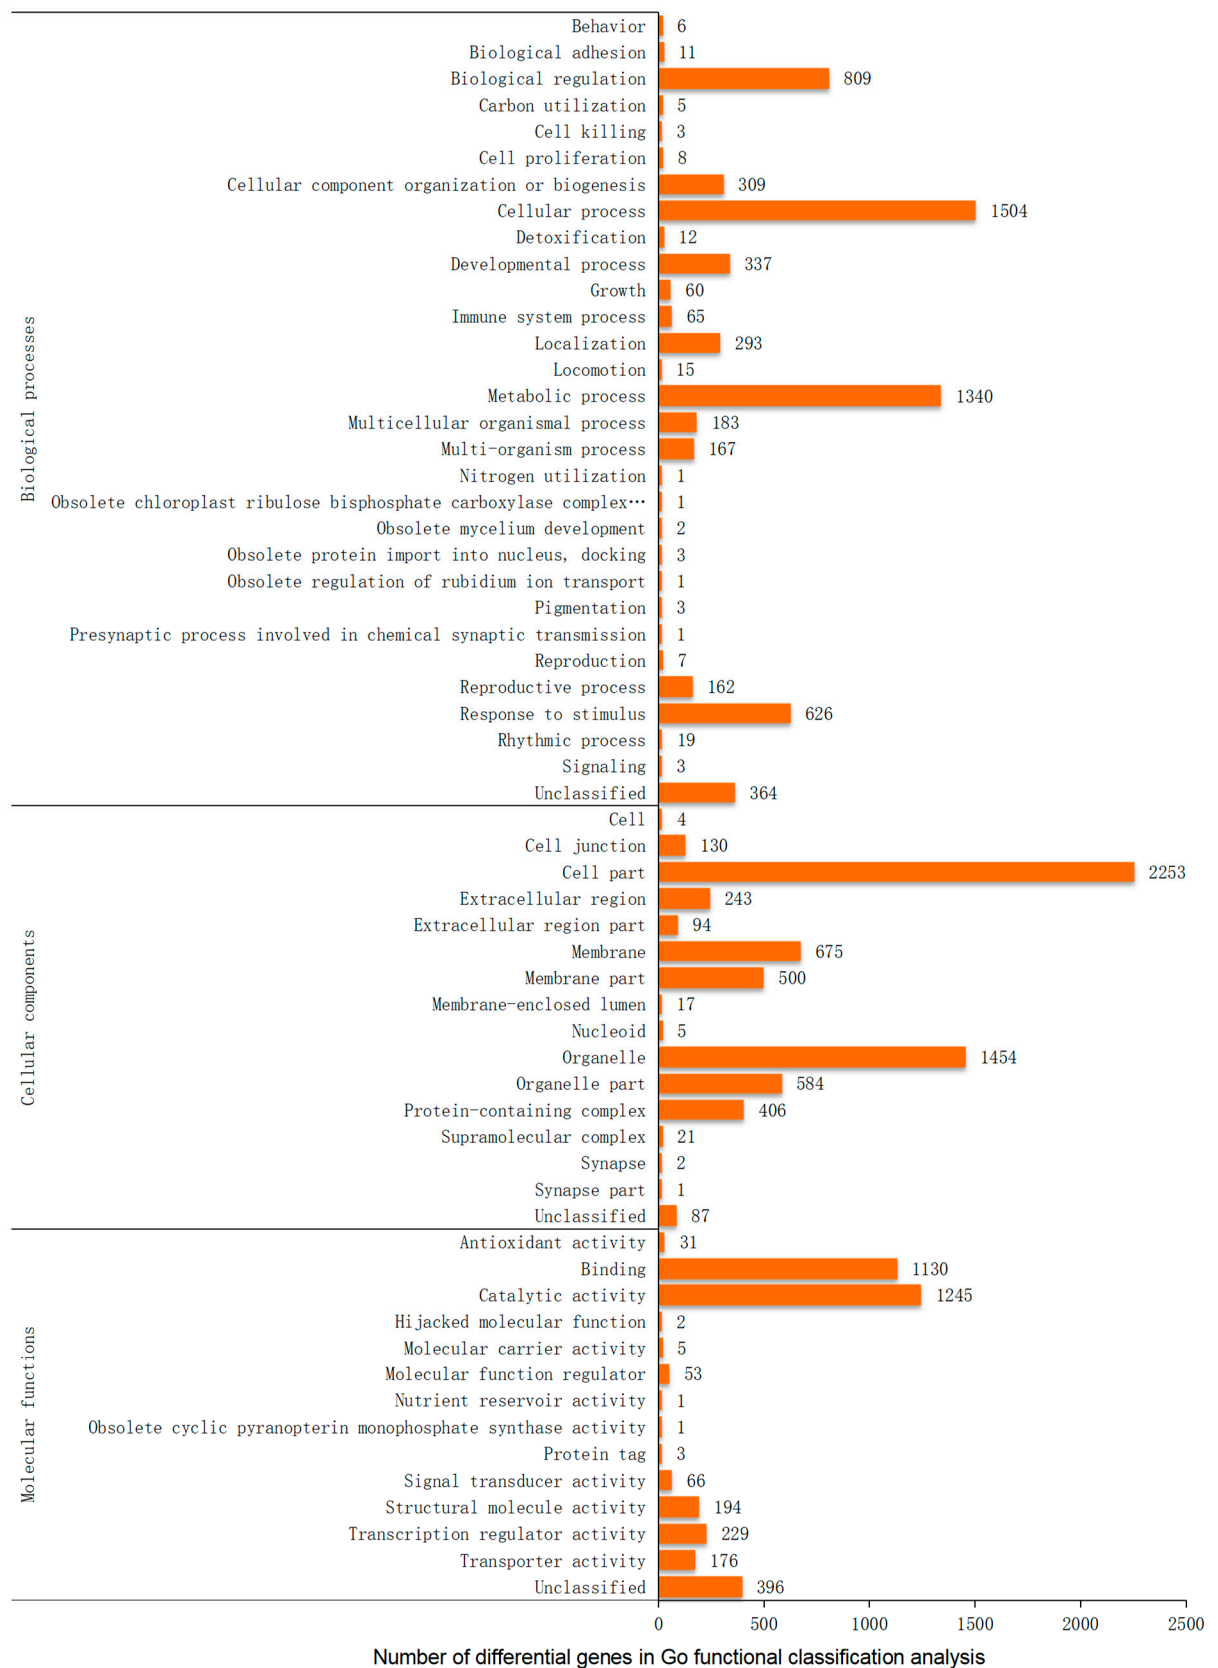

**Figure S1.** GO functional analysis of DEGs identified in toluene treated and untreated *A. pusilla*.

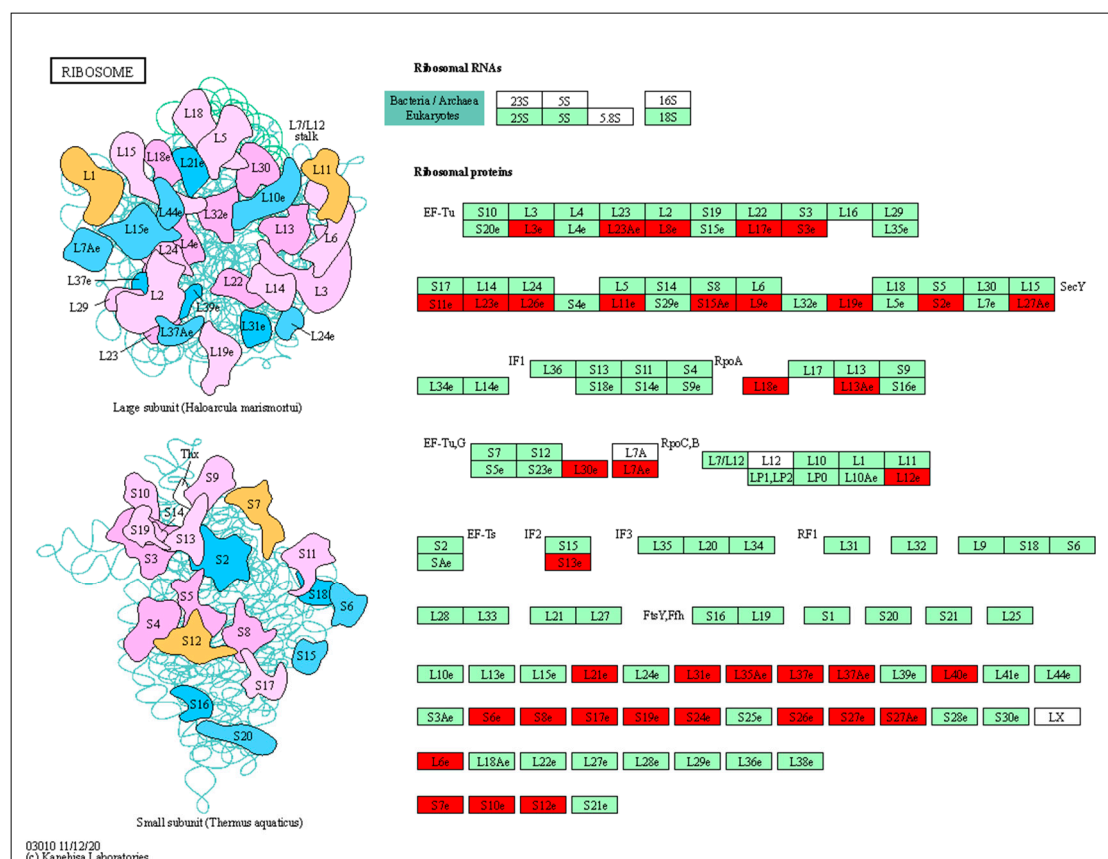

**Figure S2.** KEGG analysis DEGs in ribosome after toluene treatment in *A. pusilla*. Red bars: up-regulation; blue bars: down-regulation; green bars: represent organism-specific pathways, and indicate that map objects exist and are linked to corresponding entries.
